# Supplementary material for: “Half the truth is often a great lie:” testing for tick-borne diseases and implications for surveillance
Source: bioRxiv or medRxiv preprint supplement (doi:10.1101/2022.02.08.22270683), 2022-02-09
Supplement: Supplementary file [file media-1.pdf]

## SUPPLEMENTAL TABLES

**Table S1:** Total number of individuals tested for Lyme disease and testing results

|                 | <b>Antibody</b> | <b>IgG</b> | <b>IgM</b> | <b>PCR</b> | <b>Overall</b> |
|-----------------|-----------------|------------|------------|------------|----------------|
| Individuals     | 9858            | 614        | 614        | 222        | 10208          |
| Total Tests     | 10460           | 666        | 666        | 224        | 12016          |
| Positive Tests  | 197 (2.0)       | 26 (4.2)   | 88 (14.3)  | 0 (0.0)    | 311 (3.1)      |
| Negative Tests  | 10240           | 639        | 557        | 224        | 11680          |
| Equivocal       | 23              | 1          | 1          | 0          | 25             |
| Confirmed Cases | ---             | ---        | ---        | ---        | 76 (0.8)       |
